# Supplementary material
Source: PubMed Central journal article supplement (PMC5165117)
Supplement: AEM.01991-16_zam999117590s1.pdf [file AEM.01991-16_zam999117590s1.pdf]

SUPPLEMENTARY MATERIAL

1  
2  
3  
4  
5  
6  
7  
8  
9  
10  
11  
12  
13  
14  
15  
16  
17  
18  
19  
20  
21  
22  
23  
24

Biochemical and genetic basis of indole-3-acetic acid (auxin phytohormone) degradation by the plant growth promoting rhizobacterium *Paraburkholderia phytofirmans* PsJN.

Raúl Donoso, Pablo Leiva-Novoa, Ana Zúñiga, Tania Timmermann, Gonzalo Recabarren-Gajardo, and Bernardo González.

*Paraburkholderia phytofirmans* PsJN

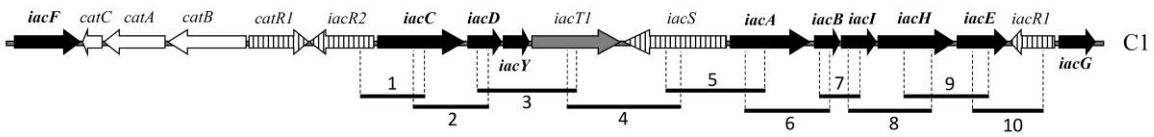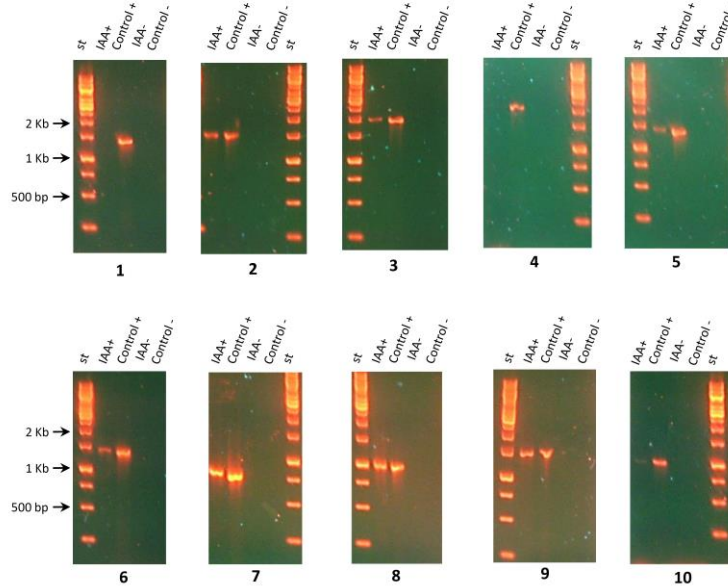

1  
2  
3  
4  
5  
6  
7  
8  
9  
10  
11

Figure S1. Transcriptional analysis of *iac* genes apparently grouped in operon functional units. The numbers correspond to the DNA fragments amplified by PCR using primer pairs shown in Table 1. 1 (1.37 kb): Mut *iacR2Rv*-Mut *iacCRv*; 2 (1.46 kb): Mut *iacCFw*-Mut *iacDRv*; 3 (1.90 kb): Mut *iacDFw*-Mut *iacT1Rv*; 4 (1.91 kb): Mut *iacT1Fw*-Mut *iacSFw*; 5 (1.68 kb): Mut *iacSRv*-Mut *iacARv*; 6 (1.35 kb): Mut *iacAFw*-Mut *iacBRv*; 7 (0.78 kb): Mut *iacBFw*-Mut *iacIRv*; 8 (1.01 kb): Mut *iacIFw*-Mut *iacHRv*; 9 (1.41 kb): Mut *iacHFw*-Mut *iacERv*; 10 (0.97 kb): Mut *iacEFw*-Mut *iacR1Rv*. IAA+, cDNA of strain PsJN grown in IAA; Control +, strain PsJN genomic DNA; IAA-, no reverse transcriptase control of IAA+; Control -, no DNA control.

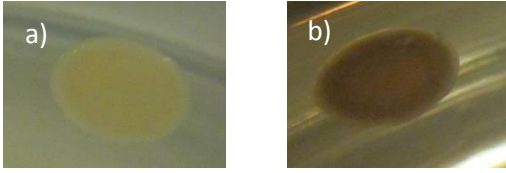

1

2 Figure S2. *Paraburkholderia phytofirmans* PsJN *catA* gene mutant cells turned  
3 brown a medium supplemented with indole-3-acetic acid (IAA). A) Wild type strain  
4 and B) *catA* mutant grown in fructose plates plus 1 mM IAA.

5

1

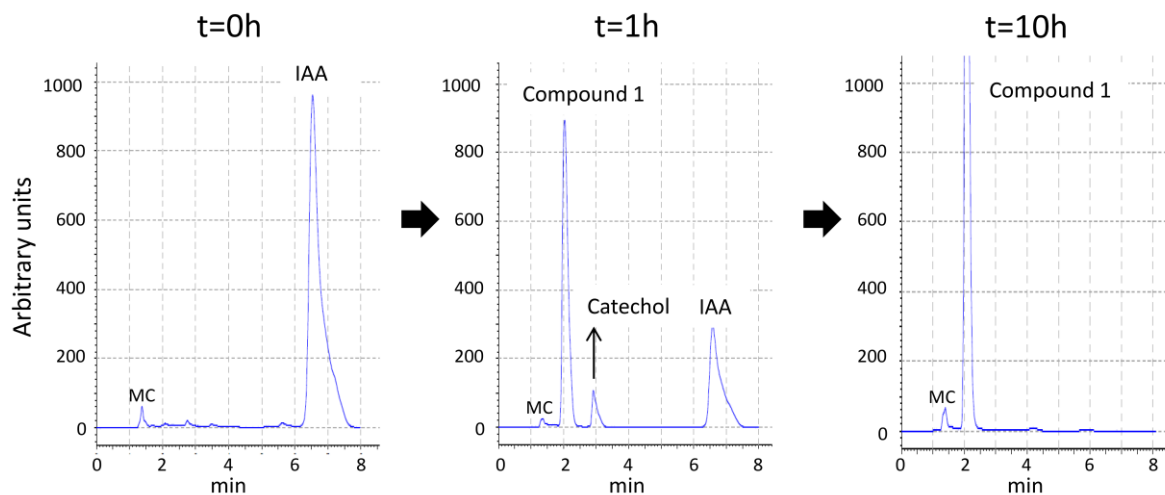

2

3 Figure S3. High-performance liquid chromatography ultraviolet chromatograms of  
4 supernatants from cultures of *Cupriavidus pinatubonensis* JMP134 derivatives  
5 harboring *iacABIHECDGF* genes (strain JMP134*iac1*). This strain was exposed to 1  
6 mM indole-3-acetic acid (IAA) for 10 h. Catechol appears only transiently at 1 h due  
7 to this strain is able to metabolize it. Retention times for IAA, catechol and compound  
8 1, were 6.75, 3.05 and 2.04 min, respectively. MC, a signal found in controls without  
9 bacteria.

10

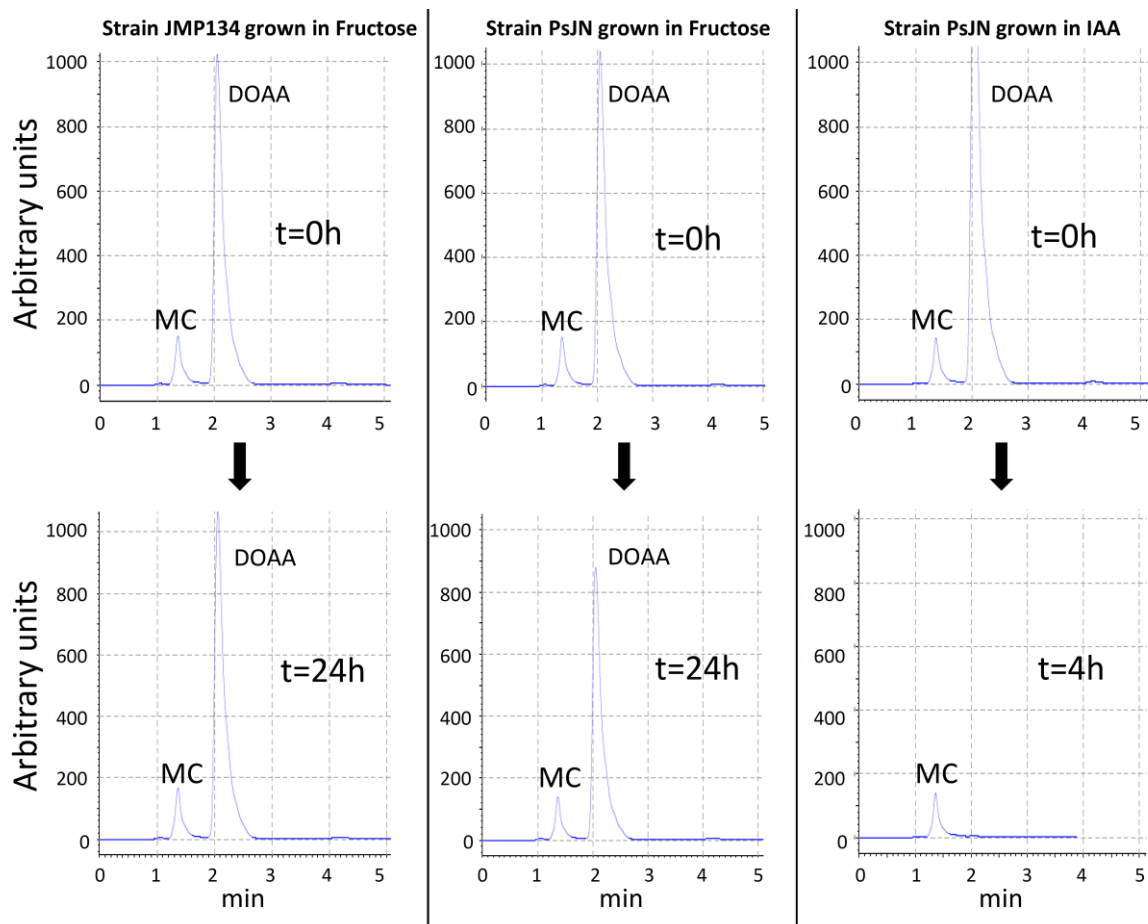

1

2 Figure S4. High-performance liquid chromatography ultraviolet chromatograms of  
 3 supernatants from cultures of *Cupriavidus pinatubonensis* JMP134 and  
 4 *Paraburkholderia phytofirmans* PsJN grown in fructose or IAA to stationary phase,  
 5 washed and later exposed to supernatant containing dioxindole-3-acetic acid  
 6 (DOAA). Retention time for compound 1 was 2.04 min. MC, a signal found in controls  
 7 without bacteria.

8

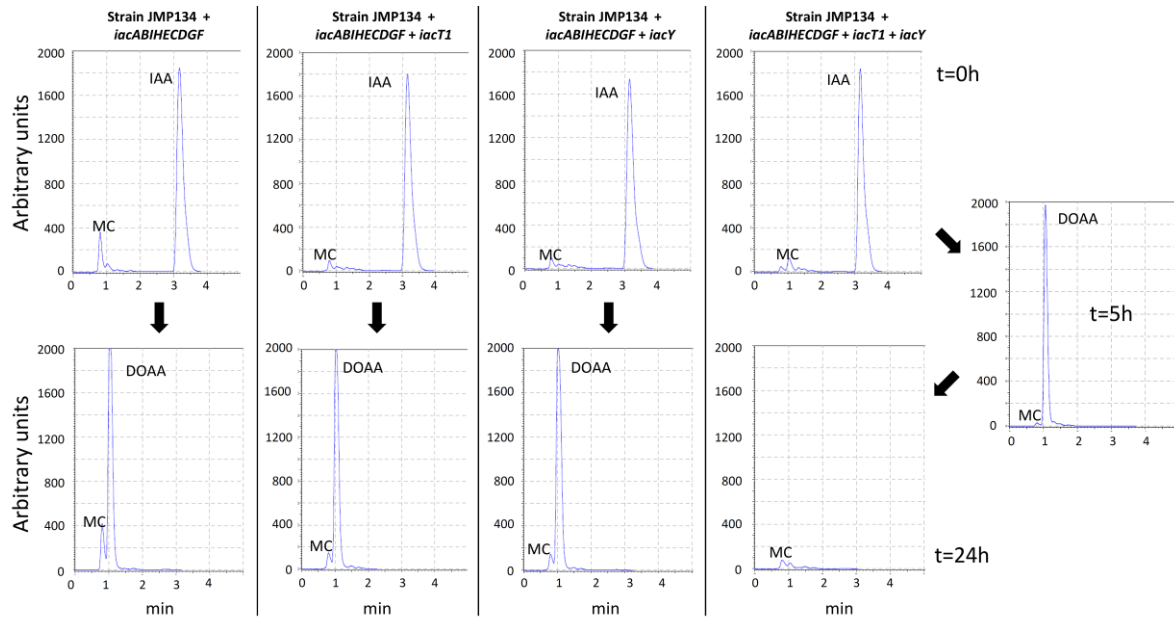

1

2 Figure S5. High-performance liquid chromatography ultraviolet chromatograms of  
 3 supernatants from cultures of *Cupriavidus pinatubonensis* JMP134 derivatives  
 4 harboring *iacABIHECDGF* genes plus *iacT1* and/or *iacY* genes, after 0 h and 24 h  
 5 of exposure to 1 mM indole-3-acetic acid (IAA). Retention times for IAA and  
 6 dioxindole-3-acetic acid (DOAA) were 3.18 and 1.03 min, respectively. MC, a signal  
 7 found in controls without bacteria.

8

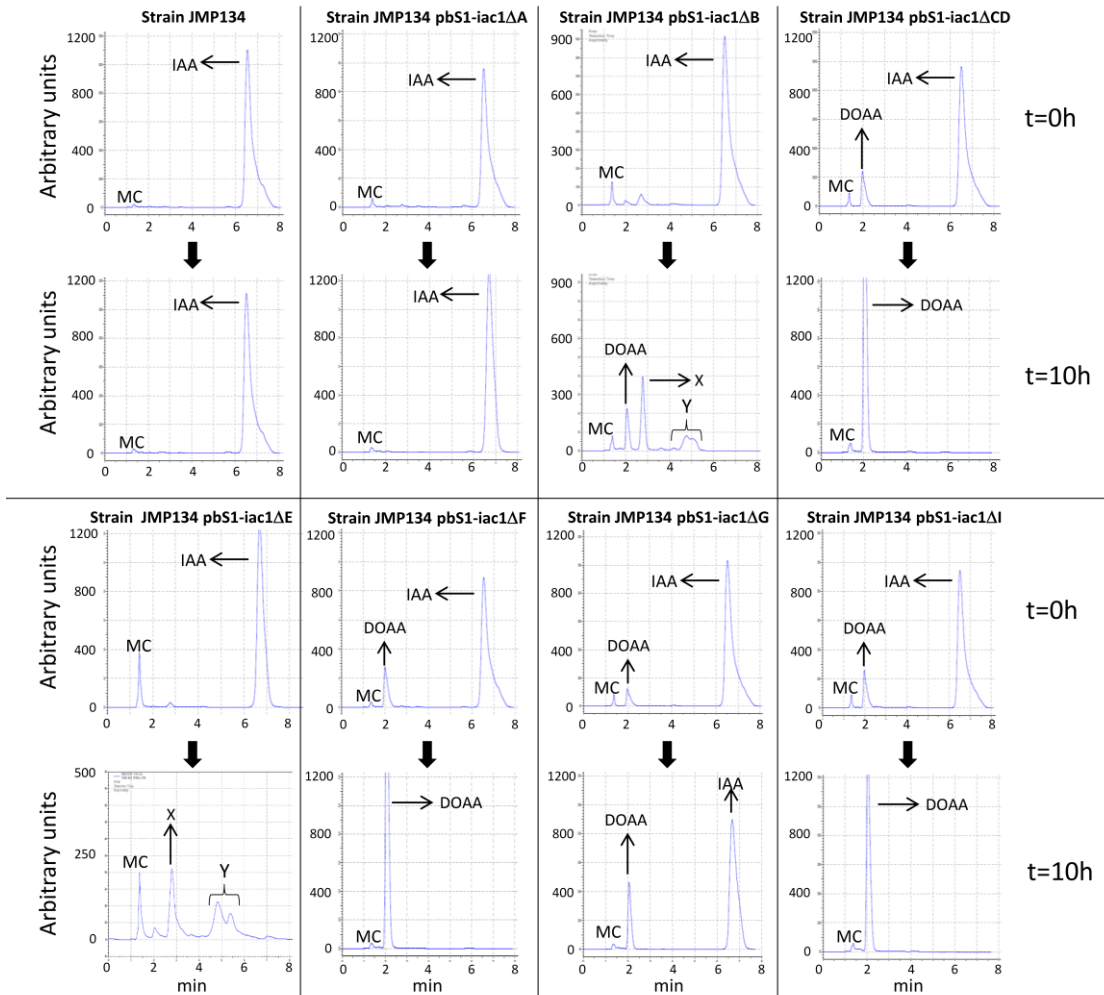

1

2 Figure S6. High-performance liquid chromatography ultraviolet chromatograms of  
 3 supernatants from cultures of *Cupriavidus pinatubonensis* JMP134 harboring pbS1-  
 4 iac1ΔA, pbS1-iac1ΔB, pbS1-iac1ΔCD, pbS1-iac1ΔE, pbS1-iac1ΔF, pbS1-iac1ΔG  
 5 and pbS1-iac1ΔI after 0 h and 10 h of exposure to 1 mM indole-3-acetic acid (IAA).  
 6 Retention times for IAA, dioxindole-3-acetic acid (DOAA), compound X and  
 7 compound Y were 6.75, 2.04, 2.78 and 4.85-5.30 min, respectively. Despite the very  
 8 short period between the initial time of IAA exposure and the zero time sampling  
 9 (usually less than 1-2 min), in some strains/conditions, the DOAA signal at time 0  
 10 was detected. MC, a signal found in controls without bacteria.

1

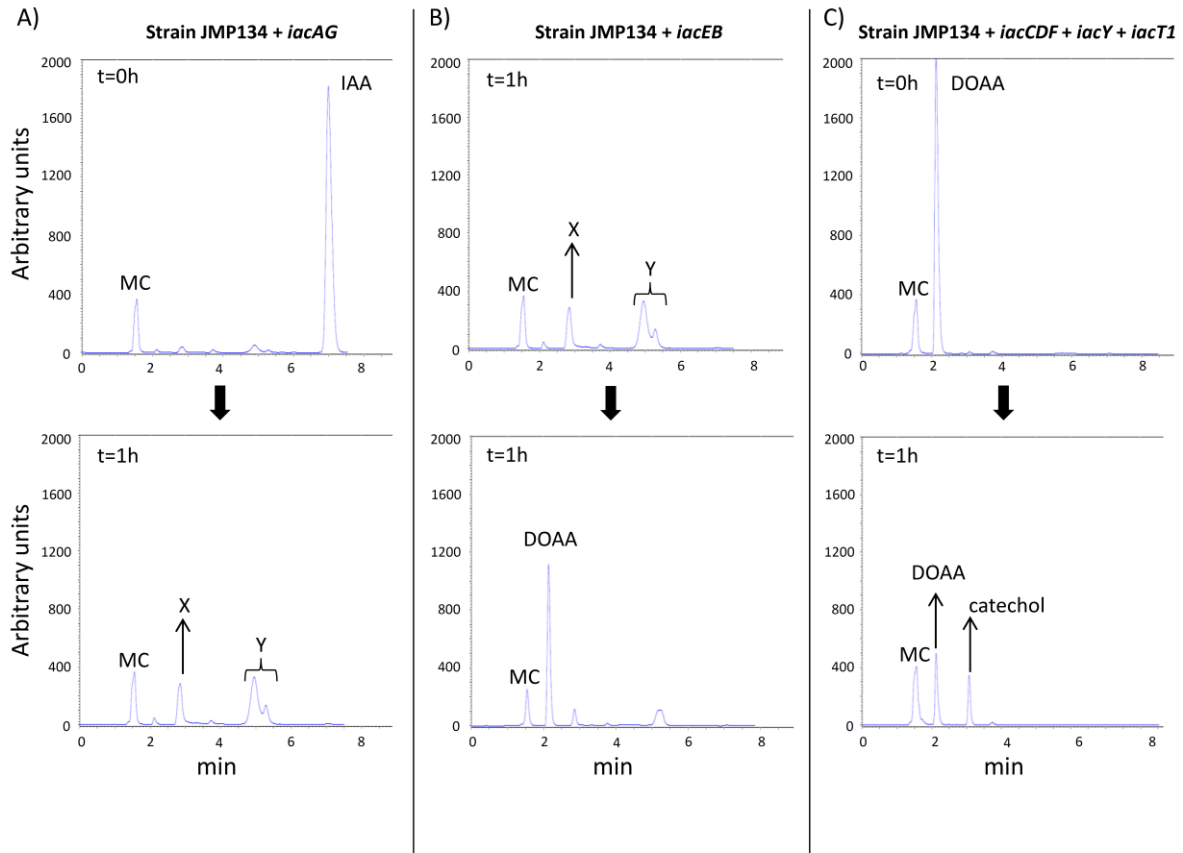

2

3 Figure S7. High-performance liquid chromatography ultraviolet chromatograms of  
4 supernatants from cultures of *Cupriavidus pinatubonensis* JMP134 derivatives  
5 harboring A) *iacAG*, B) *iacEB* and C) *iacCDF**T1Y* genes, after 0 h and 1 h of  
6 exposure to 1 mM indole-3-acetic acid (IAA), or supernatants containing compounds  
7 designated X-Y, or dioxindole-3-acetic acid (DOAA). Retention times for IAA, DOAA,  
8 compound X and compound Y were 6.75, 2.04, 2.78 and 4.85-5.30 min, respectively.  
9 MC, a signal found in controls without bacteria.

10



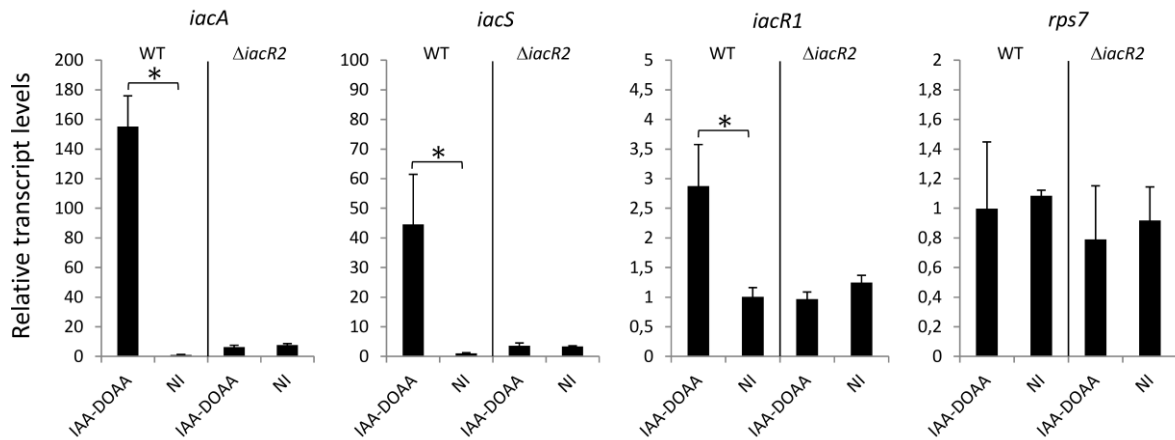

1

2 Figure S8. *iacR2* regulator positively controls transcription levels of *iacS* and *iacR1*  
3 gene encoded regulators. Transcript levels of *iacA*, *iacS* and *iacR1* from cells of  
4 strain PsJN wild type (WT) and *iacR2* mutant derivative ( $\Delta iacR2$ ) grown in fructose  
5 (mid-log phase) exposed 1 h to mixtures of indole-3-acetic acid (IAA) and dioxindole-  
6 3-acetic acid (DOAA). It should be noted that transcript levels of the ribosomal  
7 protein S7 (*rpS7*) gene, used as expression controls, remained unchanged under  
8 these conditions. Transcript levels were normalized to the average value of the  
9 transcript levels in the non-induced (NI) condition. 16S rRNA was used as a  
10 reference gene (internal control). All experiments were performed in three biological  
11 replicates. Error bars represent standard deviations. Asterisks indicates significant  
12 differences between treatments (Student's t-test,  $p < 0.05$ ).

13

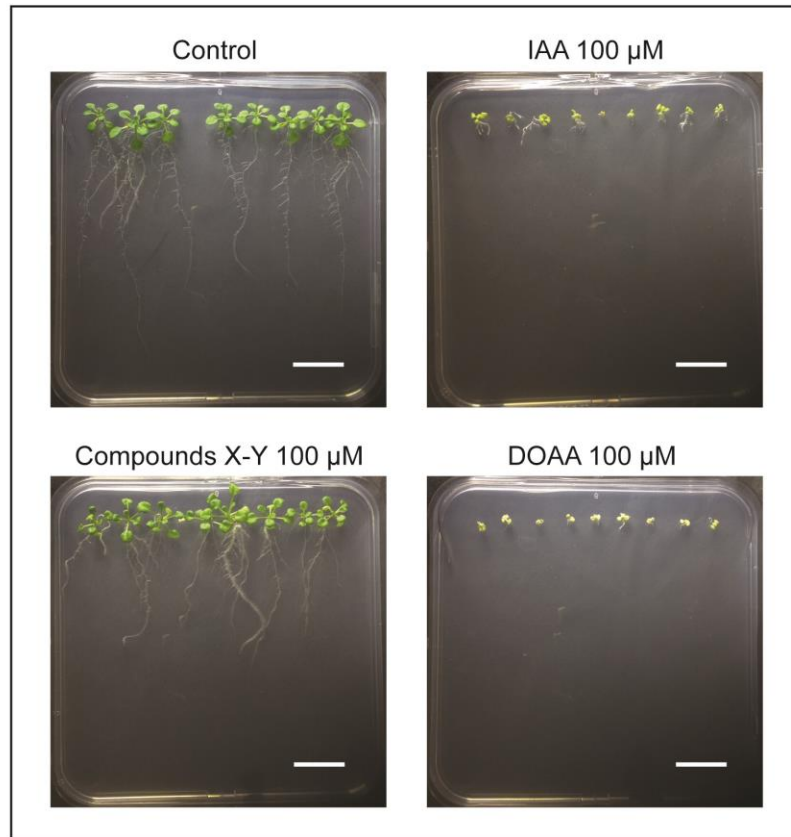

1  
2 Figure S9. Effects of metabolites of indole-3-acetic acid biodegradation on  
3 *Arabidopsis thaliana* plants. Phenotype of *A. thaliana* plants cultivated with indole-3-  
4 acetic acid (IAA), dioxindole-3-acetic acid (DOAA), or compounds X-Y. Col-0 *A.*  
5 *thaliana* seeds, previously sterilized, were sown on square Petri dishes with half  
6 strength Murashige and Skoog medium (1) 0.8% agar (50% MS) (control); 50% MS  
7 supplemented with IAA (100  $\mu$ M); 50% MS supplemented with DOAA (100  $\mu$ M) or  
8 50% MS supplemented with compounds X-Y (100  $\mu$ M). Plates were placed vertically  
9 in a growth chamber at 22°C with a photoperiod of 16 h of light and 8 h of dark for  
10 19 days. The assay was done in triplicate (n = 27 plants per treatment). White bars  
11 in photographs correspond to 2 cm. Compounds X-Y or DOAA were prepared using  
12 10-fold diluted supernatants of strain JMP134-*iacAG* or JMP134-*iac1* resting cells  
13 previously exposed to 1 mM IAA, as the only carbon source for 2 h, respectively.

- 1 Table S1. Amino acid identity percentages between *iac* genes encoded products in  
 2 *Pseudomonas putida* 1290 and *Paraburkholderia phytofirmans* PsJN.

| <b><i>P. putida</i> 1290 gene; accession number; Automatic annotation<sup>A</sup></b> | <b><i>P. phytofirmans</i> PsJN locus tag</b> | <b>Amino acid identity</b> |
|---------------------------------------------------------------------------------------|----------------------------------------------|----------------------------|
| <i>iacA</i> ; ABY62757;<br>Acyl-CoA dehydrogenase-like                                | Bphyt_2161, Bphyt_6111                       | 56%, 49%                   |
| <i>iacB</i> ; ABY62758;<br>Conserved hypothetical protein                             | Bphyt_2162                                   | 57%                        |
| <i>iacC</i> ; ABY62759;<br>Aromatic ring hydroxylating dioxygenase                    | Bphyt_2156                                   | 62%                        |
| <i>iacD</i> ; ABY62760;<br>Aromatic ring hydroxylating dioxygenase                    | Bphyt_2157                                   | 44%                        |
| <i>iacE</i> ; ABY62761;<br>Short-chain dehydrogenase/reductase                        | Bphyt_2165                                   | 52%                        |
| <i>iacF</i> ; ABY62762;<br>Ferredoxin                                                 | Bphyt_2150, Bphyt_4243                       | 41%, 38%                   |
| <i>iacG</i> ; ABY62763;<br>Flavin reductase                                           | Bphyt_5028, Bphyt_2167, Bphyt_6112           | 53%, 50%, 47%              |
| <i>iacH</i> ; ABY62765;<br>Glu-tRNA amidotransferase                                  | Bphyt_2164                                   | 52%                        |
| <i>iacI</i> ; ABY62766;<br>Conserved hypothetical protein                             | Bphyt_2163                                   | 44%                        |
| <i>iacR</i> ; ABY62764;<br>Transcriptional regulator MarR family                      | absent                                       | NA                         |

- 3 <sup>A</sup>Automatic annotation: *iac* genes of *P. putida* 1290 (2) have highest BLASTP  
 4 similarities to sequenced strain *P. putida* GB-1, which possess *iac* genes  
 5 automatically annotated. NA: not apply.

1 Table S2. Amino acid identity percentages between additional *iac* genes of  
 2 *Paraburkholderia phytofirmans* PsJN and proteins with demonstrated genetical  
 3 and/or biochemical functions.

| <b>Locus;<br/>gene name</b> | <b>Lenght<br/>(aa)</b> | <b>Homology with</b>                  | <b>Identity<br/>(%)</b> | <b>Lenght<br/>(aa)</b> | <b>Strain</b>                          | <b>Reference</b> |
|-----------------------------|------------------------|---------------------------------------|-------------------------|------------------------|----------------------------------------|------------------|
| Bphyt_2158;<br><i>iacY</i>  | 127                    | 2-hydroxymuconate<br>tautomerase      | 45                      | 63                     | <i>Pseudomonas<br/>stutzeri</i>        | 3                |
| Bphyt_2159;<br><i>iacT1</i> | 438                    | Shikimate transporter                 | 40                      | 438                    | <i>Escherichia<br/>coli</i>            | 4                |
| Bphyt_6110;<br><i>iacT2</i> | 452                    | Shikimate transporter                 | 41                      | 438                    | <i>Escherichia<br/>coli</i>            | 4                |
| Bphyt_2160;<br><i>iacS</i>  | 506                    | Sensor protein FixL                   | 31                      | 505                    | <i>Bradyrhizobium<br/>japonicum</i>    | 5                |
| Bphyt_2166;<br><i>iacR1</i> | 220                    | Response regulator<br>protein TodT    | 45                      | 227                    | <i>Pseudomonas<br/>putida</i>          | 6                |
| Bphyt_2155;<br><i>iacR2</i> | 316                    | Transcriptional<br>activator NagR     | 39                      | 301                    | <i>Ralstonia sp.<br/>strain U2</i>     | 7                |
| Bphyt_2152;<br><i>catA</i>  | 302                    | Catechol<br>1,2-dioxygenase 2         | 98                      | 275                    | <i>Acinetobacter<br/>lwoffii</i>       | 8                |
| Bphyt_1590;<br><i>catA2</i> | 311                    | Catechol<br>1,2-dioxygenase 1         | 89                      | 311                    | <i>Acinetobacter<br/>lwoffii</i>       | 8                |
| Bphyt_2153;<br><i>catB</i>  | 385                    | Muconate<br>cycloisomerase 1-2        | 91                      | 385                    | <i>Acinetobacter<br/>lwoffii</i>       | 8                |
| Bphyt_1588;<br><i>catB2</i> | 375                    | Muconate<br>cycloisomerase 1          | 62                      | 375                    | <i>Pseudomonas<br/>putida</i>          | 9                |
| Bphyt_2151;<br><i>catC</i>  | 96                     | Muconolactone<br>delta-isomerase 2    | 95                      | 96                     | <i>Acinetobacter<br/>lwoffii</i>       | 8                |
| Bphyt_1587;<br><i>catC2</i> | 100                    | Muconolactone<br>delta-isomerase      | 81                      | 92                     | <i>Cupriavidus<br/>pinatubonensis</i>  | 10               |
| Bphyt_1591;<br><i>benA</i>  | 452                    | Benzoate dioxygenase<br>large subunit | 60                      | 461                    | <i>Acinetobacter<br/>calcoaceticus</i> | 11               |

4

5

1 Table S3. Growth of *Cupriavidus pinatubonensis* JMP134, *Paraburkholderia*  
 2 *phytofirmans* PsJN and its derivative mutants in indole-3-acetic acid (IAA) or  
 3 benzoate (Bz).

| Strain                                     | IAA | Bz |
|--------------------------------------------|-----|----|
| <i>Paraburkholderia phytofirmans</i> PsJN  | +   | ++ |
| <i>Cupriavidus pinatubonensis</i> JMP134   | -   | ++ |
| PsJN::pCR2.1 <i>iacA</i>                   | -   | ++ |
| PsJN::pCR2.1 <i>iacA iacABIHECDGF-pBS1</i> | +   | ++ |
| PsJN::pCR2.1 <i>iacA iacBIHECDGF-pBS1</i>  | -   | ++ |
| PsJN::pCR2.1 <i>iacB</i>                   | -   | ++ |
| PsJN::pCR2.1 <i>iacB iacABIHECDGF-pBS1</i> | +   | ++ |
| PsJN::pCR2.1 <i>iacB iacAIHECDGF-pBS1</i>  | -   | ++ |
| PsJN::pCR2.1 <i>iacC</i>                   | -   | ++ |
| PsJN::pCR2.1 <i>iacC iacABIHECDGF-pBS1</i> | +   | ++ |
| PsJN::pCR2.1 <i>iacC iacABIHEGF-pBS1</i>   | -   | ++ |
| PsJN::pCR2.1 <i>iacD</i>                   | -   | ++ |
| PsJN::pCR2.1 <i>iacE</i>                   | -   | ++ |
| PsJN::pCR2.1 <i>iacF</i>                   | -   | ++ |
| PsJN::pCR2.1 <i>iacG</i>                   | +/- | ++ |
| PsJN::pCR2.1 <i>iacH</i>                   | -   | ++ |
| PsJN::pCR2.1 <i>iacH iacH-pBS1</i>         | -   | ++ |
| PsJN::pCR2.1 <i>iacH iacE-pBS1</i>         | +   | ++ |
| PsJN::pCR2.1 <i>iacI</i>                   | -   | ++ |
| PsJN::pCR2.1 <i>iacI iacABIHECDGF-pBS1</i> | +   | ++ |
| PsJN::pCR2.1 <i>iacI iacABHECDGF-pBS1</i>  | -   | ++ |
| PsJN::pCR2.1 <i>iacY</i>                   | +   | ++ |
| PsJN::pCR2.1 <i>iacR1</i>                  | -   | ++ |
| PsJN::pCR2.1 <i>iacR2</i>                  | -   | ++ |
| PsJN::pCR2.1 <i>iacS</i>                   | +/- | ++ |
| PsJN::pCR2.1 <i>iacT1</i>                  | +   | ++ |
| PsJN::pCR2.1 <i>catA</i>                   | -*  | ++ |
| PsJN::pCR2.1 <i>iacA2</i>                  | +   | ++ |
| PsJN::pCR2.1 <i>iacG2</i>                  | +   | ++ |
| PsJN::pCR2.1 <i>iacT2</i>                  | +   | ++ |

4 ++, Growth after 24 h; +, Growth after 48h; +/-, Growth after 60h; -, No growth after  
 5 7 days. WT: wild type. IAA 2.5 mM; Bz 2.5 mM. \*Growth medium turned brown.

6

1 Table S4. <sup>1</sup>H and <sup>13</sup>C NMR data of compound 1.

| Metabolite                                 | Structure | Nucleus | Splitting | Chemical shift (ppm) | Coupling constants (Hz) |
|--------------------------------------------|-----------|---------|-----------|----------------------|-------------------------|
| 2-(3-hydroxy-2-oxoindolin-3-yl)acetic acid |           | H1      | bs        | 3.42                 | -                       |
|                                            |           | H2      | s         | 2.91                 | -                       |
|                                            |           | H3      | bs        | 3.42                 | -                       |
|                                            |           | H4      | d         | 7.31                 | <i>J</i> =7.3           |
|                                            |           | H5      | t         | 6.93                 | <i>J</i> =7.5           |
|                                            |           | H6      | t         | 7.19                 | <i>J</i> =7.6           |
|                                            |           | H7      | d         | 6.79                 | <i>J</i> =7.7           |
|                                            |           | H8      | s         | 10.22                | -                       |
|                                            |           | C1'     | -         | 178.5                | -                       |
|                                            |           | C2'     | -         | 42.2                 | -                       |
|                                            |           | C3'     | -         | 73.0                 | -                       |
|                                            |           | C4'     | -         | 131.7                | -                       |
|                                            |           | C5'     | -         | 124.3                | -                       |
|                                            |           | C6'     | -         | 121.7                | -                       |
|                                            |           | C7'     | -         | 129.6                | -                       |
|                                            |           | C8'     | -         | 109.9                | -                       |
|                                            |           | C9'     | -         | 143.2                | -                       |
| C10'                                       | -         | 170.7   | -         |                      |                         |

2 Singlet, doublet, triplet and broad signal are abbreviated as s, d, t and bs,  
 3 respectively. Chemical shift and coupling constants were calculated from  
 4 representative spectra obtained from compound 1 dissolved in DMSO-*d*<sub>6</sub>. <sup>1</sup>H and <sup>13</sup>C  
 5 NMR data were recorded at 400 and 100 MHz, respectively.

6

## 1 Supplemental material references

- 2 1. Murashige T, Skoog F. 1962. A revised medium for rapid growth and bio  
3 assays with tobacco tissue cultures. *Physiol. Plant.* 15:473–497.
- 4 2. Leveau JH, Gerards S. 2008. Discovery of a bacterial gene cluster for  
5 catabolism of the plant hormone indole 3-acetic acid. *FEMS Microbiol. Ecol.*  
6 65:238-250.
- 7 3. Bosch R, García-Valdés E, Moore ER. 2000. Complete nucleotide sequence  
8 and evolutionary significance of a chromosomally encoded naphthalene-  
9 degradation lower pathway from *Pseudomonas stutzeri* AN10. *Gene* 245:65-  
10 74.
- 11 4. Whipp MJ, Camakaris H, Pittard AJ. 1998. Cloning and analysis of the *shiA*  
12 gene, which encodes the shikimate transport system of *Escherichia coli* K-12.  
13 *Gene* 209:185-192.
- 14 5. Anthamatten D, Hennecke H. 1991. The regulatory status of the *fixL*- and *fixJ*-  
15 like genes in *Bradyrhizobium japonicum* may be different from that in  
16 *Rhizobium meliloti*. *Mol. Gen. Genet.* 225:38-48.
- 17 6. Lau PC, Wang Y, Patel A, Labbé D, Bergeron H, Brousseau R, Konishi Y,  
18 Rawlings M. 1997. A bacterial basic region leucine zipper histidine kinase  
19 regulating toluene degradation. *Proc. Natl. Acad. Sci. USA* 94:1453-1458.
- 20 7. Zhou NY, Fuenmayor SL, Williams PA. 2001. *nag* genes of *Ralstonia*  
21 (formerly *Pseudomonas*) sp. strain U2 encoding enzymes for gentisate  
22 catabolism. *J. Bacteriol.* 183:700-708.

- 1 8. Kim SI, Leem SH, Choi JS, Chung YH, Kim S, Park YM, Park YK, Lee YN,  
2 Ha KS. 1997. Cloning and characterization of two *catA* genes in *Acinetobacter*  
3 *lwoffii* K24. J. Bacteriol. 179:5226-5231.
- 4 9. Aldrich TL, Frantz B, Gill JF, Kilbane JJ, Chakrabarty AM. 1987. Cloning and  
5 complete nucleotide sequence determination of the *catB* gene encoding  
6 *cis,cis*-muconate lactonizing enzyme. Gene 52:185-195.
- 7 10. Prucha M, Peterseim A, Timmis KN, Pieper DH. 1996. Muconolactone  
8 isomerase of the 3-oxoadipate pathway catalyzes dechlorination of 5-chloro-  
9 substituted muconolactones. Eur. J. Biochem. 237:350-356.
- 10 11. Neidle EL, Hartnett C, Ornston LN, Bairoch A, Rejik M, Harayama S. 1991.  
11 Nucleotide sequences of the *Acinetobacter calcoaceticus benABC* genes for  
12 benzoate 1,2-dioxygenase reveal evolutionary relationships among  
13 multicomponent oxygenases. J. Bacteriol. 173:5385-5395.
